1 **Testing the sensitivity of diagnosis-derived patterns in functional brain networks to**  
2 **symptom burden in a Norwegian youth sample**

3  
4 **Authors:**

5 Irene Voldsbekk<sup>1,2</sup>, Rikka Kjelkenes<sup>1,2</sup>, Erik R. Frogner<sup>1,2</sup>, Lars T. Westlye<sup>1,2,3</sup>, Dag Alnæs<sup>1</sup>

6  
7 <sup>1</sup> Norwegian Centre for Mental Disorders Research (NORMENT), Division of Mental Health  
8 and Addiction, Oslo University Hospital, Oslo, Norway

9 <sup>2</sup> Department of Psychology, University of Oslo, Oslo, Norway

10 <sup>3</sup> KG Jebsen Centre for Neurodevelopmental Disorders, University of Oslo, & Department of  
11 Neurology, Oslo University Hospital, Oslo, Norway

12

13 **Corresponding author:**

14 Full name: Irene Voldsbekk

15 Address: NORMENT, Oslo universitetssykehus HF

16 Klinikk psykisk helse og avhengighet

17 Seksjon for psykoseforskning/TOP

18 Ullevål sykehus, bygg 49

19 Postboks 4956 Nydalen

20 0424 Oslo

21 Phone: +47 41495202

22 Email: [irene.voldsbekk@psykologi.uio.no](mailto:irene.voldsbekk@psykologi.uio.no)

23

24 **Keywords:**

25 Multivariate, validation, generalizability, psychopathology, functional connectivity

26

27

28 **Abstract**

29 Aberrant brain network development represents a putative aetiological component in mental  
30 disorders, which typically emerge during childhood and adolescence. Previous studies have  
31 identified resting-state functional connectivity (RSFC) patterns reflecting psychopathology,  
32 but the generalisability to other samples and politico-cultural contexts has not been  
33 established.

34 We investigated whether a previously identified cross-diagnostic case-control and  
35 autism spectrum disorder (ASD)-specific pattern of RSFC (discovery sample; aged 5-21 from  
36 New York City, USA; n=1666) could be validated in a Norwegian convenience-based youth  
37 sample (validation sample; aged 9-25 from Oslo, Norway; n=531). As a test of  
38 generalisability, we investigated if these diagnosis-derived RSFC patterns were sensitive to  
39 levels of symptom burden in both samples, based on an independent measure of symptom  
40 burden.

41 Both the cross-diagnostic and ASD-specific RSFC pattern were validated across  
42 samples. Connectivity patterns were significantly associated with thematically appropriate  
43 symptom dimensions in the discovery sample. In the validation sample, the ASD-specific  
44 RSFC pattern showed a weak, inverse relationship with symptoms of conduct problems,  
45 hyperactivity, and prosociality, while the cross-diagnostic pattern was not significantly linked  
46 to symptoms.

47 Diagnosis-derived connectivity patterns in a developmental clinical US sample were  
48 validated in a convenience sample of Norwegian youth, however, they were not associated  
49 with mental health symptoms.

50

## 51 **1 Introduction**

52 Childhood and adolescence constitute periods of life characterised by substantial  
53 developmental adaptations. These include rapid physical, hormonal, brain, cognitive, and  
54 psychological changes, adapted to the increasing complexity of our social environment and  
55 expectations with age. For example, during this time, the functional networks of the brain  
56 undergo large-scale reorganisation and maturation (Paus et al., 2008; Power et al., 2010;  
57 Sydnor et al., 2021). Adolescence is also a period with a marked increase in the incidence of  
58 psychopathology (Kessler et al., 2007). The co-occurrence of these phenomena has led to the  
59 hypothesis that increased brain plasticity during this period results in increased susceptibility  
60 to mental illness (Paus et al., 2008). Several studies have identified plausible links between  
61 psychopathology in youth and resting-state functional connectivity (RSFC) derived from  
62 functional magnetic resonance imaging (fMRI). However, the generalisability of such  
63 network patterns to vulnerability for mental illness in non-clinical samples is currently not  
64 well demonstrated.

65 In the context of generalisability and vulnerability, a related question is whether  
66 RSFC patterns are specific to diagnostic categories of mental disorders or shared across  
67 disorders. Considerable effort has been made to characterise RSFC patterns associated with  
68 both diagnostic syndromes and dimensional symptom scores. Transdiagnostic patterns can be  
69 identified by including participants with a range of (comorbid) diagnoses, or by modelling  
70 dimensional scores of multiple symptom domains. Using these approaches, an increasing  
71 number of studies have reported that RSFC patterns relating to psychopathology are  
72 transdiagnostic or shared across disorders (Elliott et al., 2018; Karcher et al., 2021; Kebets et  
73 al., 2023; Lees et al., 2021; Linke et al., 2021; McTeague et al., 2017; McTeague et al., 2020;  
74 Sha et al., 2019; Voldsbekk et al., 2023; Xia et al., 2018). For example, in a population-based  
75 sample of children (Adolescent Brain Cognitive Development cohort; ABCD), a shared  
76 psychopathology factor was derived and linked to RSFC using both symptom data (Karcher  
77 et al., 2021) and diagnostic data (Lees et al., 2021).

78 The convergence of studies on a shared factor across disorders from studies using  
79 both symptom scores as well as binary diagnosis information supports the notion of a latent  
80 vulnerability factor on which the diagnostic categories represent extremes (Sprooten et al.,  
81 2022). The above-mentioned findings linking a shared latent mental illness factor to brain  
82 measures are promising with regard to detecting neural signatures of psychopathology risk in  
83 the youth brain. However, an important question is whether these clinical RSFC patterns are  
84 sensitive to symptom burden and by extension putative risk in youth samples that are not  
85 enriched with mental disorder diagnoses.

86 Recently, we estimated both diagnosis-specific and cross-diagnostic RSFC patterns in  
87 a clinical developmental sample. Investigating shared associations across RSFC data and  
88 diagnostic information, we identified a pattern specific to a diagnosis of autism spectrum  
89 disorder (ASD). The other diagnosis categories did not exhibit a significant specific RSFC  
90 pattern, instead they exhibited a shared patterns across attention-deficit hyperactivity disorder  
91 (ADHD), ASD, other neurodevelopmental disorders, anxiety, mood-disorders, and other  
92 diagnoses versus no diagnosis (Voldsbekk et al., 2023). A possible interpretation of this  
93 finding is that cross-diagnostic and ASD-specific patterns represent the two most reliable  
94 RSFC markers of psychopathology. For any such patterns to be clinically relevant, they

95 would need to show generalisability to vulnerability for mental illness, expressed as elevated  
96 clinical symptom scores, in non-clinical samples. Thus, in the current study we aimed to  
97 investigate whether the two identified diagnosis-derived RSFC patterns are sensitive to  
98 mental health symptoms in a Norwegian convenience-based sample of youth. To do this, we  
99 investigated whether a) the cross-diagnostic and ASD-specific RSFC patterns previously  
100 identified could be validated in the validation sample, and b) if these RSFC patterns associate  
101 with levels of symptom burden in the validation sample. As a further test of external validity,  
102 we also tested whether c) the RSFC patterns previously identified associate with levels of  
103 symptom burden in the discovery sample.

104

## 105 **2 Material and Methods**

### 106 *2.1 Samples*

#### 107 *2.1.1 Discovery sample - HBN*

108 Children and adolescents from New York City, USA were recruited to be part of the HBN  
109 cohort (Alexander et al., 2017). The majority have a least one diagnosed mental disorder. In  
110 the previous study (Voldsbekk et al., 2023), 1880 participants in HBN took part. 1689 of  
111 these were in the discovery sample. Of these, 1666 had available symptom score data used  
112 for the current investigation. Missing values in the symptom data were imputed with  
113 knnimpute in MATLAB (MathWorks, 2020). To check that imputation did not influence the  
114 results, we reran the analysis in the 1610 participants without missing data and no imputation.  
115 This analysis revealed similar associations between RSFC and symptom level as the original  
116 analysis (correlations were  $r=.99$  between imputed and non-imputed result for both the cross-  
117 diagnostic and ASD patterns). For more details regarding MRI data cleaning and quality  
118 assurance steps, see Voldsbekk et al. (2023). The final sample consisted of 1666 participants  
119 (641 females, mean  $\pm$  sd age:  $10.91 \pm 3.14$ , range: 5-21). See Figure 1 and table S1 for  
120 distributions of sample characteristics.

121

#### 122 *2.1.2 Validation sample – Brainmint*

123 Children and adolescents in the Oslo region were recruited to participate in the Brains and  
124 minds in transition (Brainmint) study. Participants were recruited through convenience  
125 sampling by advertising in social media, aiming to recruit young people from the general  
126 population interested in contributing to a study investigating brain development and mental  
127 health. All participants provided written informed consent prior to their participation in the  
128 study. For participants under the age of 16, both parents/legal guardians provided written  
129 informed consent on their behalf. Per May 4<sup>th</sup> 2023, 759 participants had undergone magnetic  
130 resonance imaging (MRI) and 697 had responded to questionnaires. Of these, 531 had  
131 available both fMRI and symptom score data. No participants had missing data and so all  
132 were included in the sample used for the current analysis (390 females, mean  $\pm$  sd age:  $17.69$   
133  $\pm 2.83$ , range: 9-25). See Figure 1 and table S1 for distributions of sample characteristics.

134

### 135 *2.2 Mental health measures*

136 In the previous study (Voldsbekk et al., 2023), we investigated diagnosis-derived patterns of  
137 RSFC in HBN (discovery sample). Diagnostic information was collected using a  
138 computerised version of the Schedule for Affective Disorders and Schizophrenia – Children’s

139 version (KSADS) (Kaufman et al., 1997), which is a clinician-administered semi-structured  
140 psychiatric interview based on DSM-5. We then labelled diagnoses as belonging to either of  
141 these categories: “ADHD”, “ASD”, “anxiety disorders”, “mood disorders”, “other  
142 neurodevelopmental disorders”, “other disorders” or “no diagnosis”.

143 For testing the external validity and generalisability of diagnosis-derived RSFC  
144 patterns, the current study obtained HBN symptom scores from the Strength and Difficulties  
145 Questionnaire (Goodman, 1997), which is a 25-item questionnaire measuring emotional and  
146 behavioural problems. The SDQ has five syndrome measures: emotional symptoms, conduct  
147 problems, hyperactivity/inattention, peer relationship problems, and prosocial behaviour. For  
148 this analysis, we used only the summary syndrome measures. In HBN, the SDQ items were  
149 parent-reported. See Figure S1 for symptom load distributions on SDQ summary measures  
150 across diagnostic categories in HBN.

151 Symptom scores in Brainmint were investigated using the same approach as in HBN,  
152 only in this sample the SDQ responses were self-reported.

153

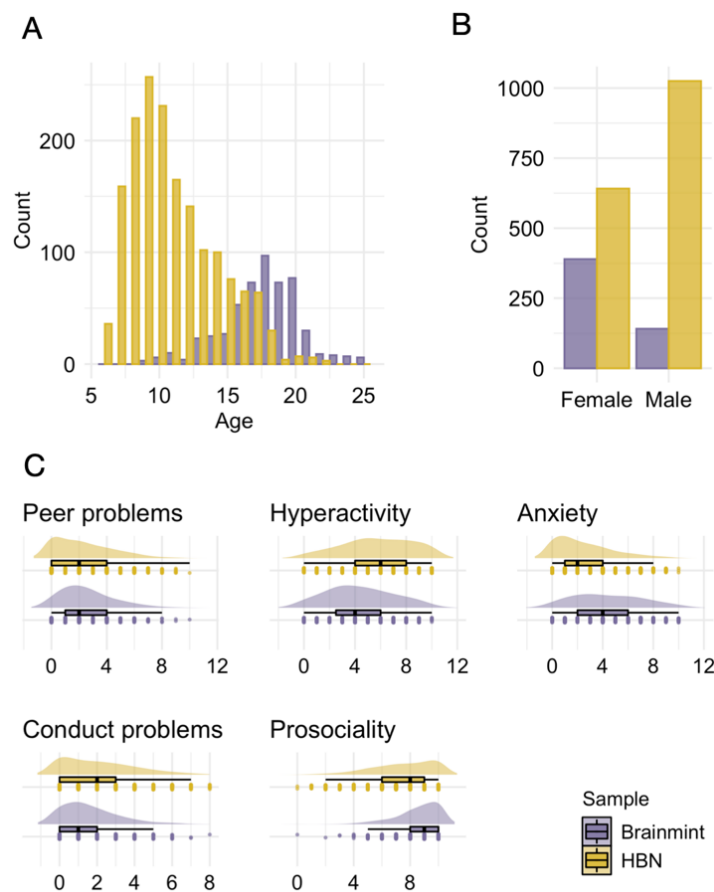

154

155 *Figure 1. Sample distributions. A. Age. B. Sex. C. SDQ summary syndrome scores. HBN; Healthy*  
156 *brain network sample. Brainmint; Brains and minds in transition sample. SDQ; Strengths and*  
157 *difficulties questionnaire.*

158

### 159 *2.3 MRI acquisition*

160 HBN MRI data were acquired at four different sites: a mobile scanner at Staten Island (SI),  
161 Rutgers University Brain Imaging Centre, Citigroup Biomedical Imaging Centre (CBIC) and

162 Harlem CUNY Advanced Science Research Centre. A detailed overview of the MRI protocol  
163 is available elsewhere

164 ([http://fcon\\_1000.projects.nitrc.org/indi/cmi\\_healthy\\_brain\\_network/MRI%20Protocol.html](http://fcon_1000.projects.nitrc.org/indi/cmi_healthy_brain_network/MRI%20Protocol.html)).

165 Brainmint MRI data were acquired at Oslo University Hospital Ullevål, using a 3.0 T  
166 GE SIGNA Premier scanner using a 48-channel head coil. Structural MRI data was acquired  
167 using an T<sub>1</sub>-weighted MPRAGE sequence (repetition time (TR): 2.526 s, echo time (TE):  
168 2.836 ms, flip angle (FA): 8°, field of view (FOV): 256 mm), slice thickness: 1 mm, locations  
169 per slab: 196 (no overlaps). Resting-state functional MRI (rs-fMRI) data was acquired using  
170 a T<sub>2</sub>\*-weighted blood-oxygen-level-dependent echo-planar imaging (EPI) sequence with a  
171 TR of 800 ms, TE of 30 ms, multiband acceleration factor = 6, number of slices: 60, 750  
172 repetitions and voxel size = 2.4 × 2.4 × 2.4 mm.

173

#### 174 *2.4 MRI pre-processing*

175 Rs-fMRI images in HBN were processed with the following pipeline. First, FSL MCFLIRT  
176 (Jenkinson et al., 2002) was applied for motion correction, as well as high-pass temporal  
177 filtering (cut-off: 100s), spatial smoothing (FWHM: 6mm) and distortion correction as part of  
178 FEAT (Woolrich et al., 2001). The rs-fMRI images were registered to a T<sub>1</sub>-weighted  
179 structural image using FLIRT (Jenkinson et al., 2002) and boundary-based registration  
180 (Greve & Fischl, 2009). Next, for additional removal of artefacts and noise, we performed  
181 non-aggressive ICA-AROMA (Pruim, Mennes, Buitelaar, et al., 2015; Pruij, Mennes, van  
182 Rooij, et al., 2015) and FIX (Griffanti et al., 2014; Salimi-Khorshidi et al., 2014). Estimations  
183 of temporal signal-to-noise ratio (tSNR) and mean framewise displacement (FD) were  
184 calculated by MRIQC (Esteban et al., 2017) and used as covariates in subsequent analyses.

185 In Brainmint, preprocessing of rs-fMRI images were run using fMRIPrep v22.0.1  
186 (Esteban et al., 2019), an automated pipeline consisting of head motion correction, high-pass  
187 temporal filtering, spatial smoothing and distortion correction using MCFLIRT, slice-timing  
188 correction using 3dTshift from AFNI, registration to structural reference image using FLIRT  
189 and boundary-based registration, and, finally, non-aggressive ICA-AROMA. Same as for  
190 HBN, estimations of tSNR and FD were calculated by MRIQC (Esteban et al., 2017).

191

#### 192 *2.5 Network analysis*

193 RSFC in HBN were derived using the Schaefer parcellation with 100 parcels and 7 networks  
194 (Schaefer et al., 2018). These networks include visual A, visual B, visual C, auditory,  
195 somatomotor A, somatomotor B, language, salience A, salience B, control A, control B,  
196 control C, default A, default B, default C, dorsal attention A and dorsal attention B. The  
197 connectivity matrix was then estimated as the L<sub>2</sub>-norm ridge regression partial correlation  
198 between parcel timeseries using FSLNets (<https://fsl.fmrib.ox.ac.uk/fsl/fslwiki/FSLNets>), as  
199 implemented in MATLAB (MathWorks, 2020). This resulted in 4950 unique partial  
200 correlations (i.e., edges).

201 RSFC in Brainmint were derived using the same approach as in HBN, making the  
202 edges comparable.

203

#### 204 *2.6 Out-of-sample validation*

205 In the previous work (Voldsbekk et al., 2023), we investigated diagnosis-specific RSFC  
206 patterns by running non-rotated behavioural partial least squares (PLS) in PLS Application  
207 (Krishnan et al., 2011). Non-rotated behavioural PLS yields maximal covariance across two  
208 matrices without rotating the behavioural matrix – in this case, maximal RSFC covariance  
209 across each diagnosis (a behavioural matrix containing either 1 or 0 for each participant for  
210 each diagnosis category). This test was run for each diagnosis category separately, while  
211 controlling for all other diagnosis categories using contrasts. This analysis revealed an ASD-  
212 specific pattern, as well as a cross diagnostic case-control pattern. The other diagnosis  
213 categories did not exhibit a diagnosis-specific RSFC pattern.

214

### 215 2.6.1 Out-of-sample validation

216 See Figure 2 for an overview of the out-of-sample validation pipeline. First, we decomposed  
217 the Brainmint RSFC data by multiplying them with the brain weights estimated in the HBN  
218 PLS analysis. These Brainmint brain weights were then correlated with the original  
219 Brainmint RSFC data to get Brainmint connectivity loadings. Then, to assess the validation  
220 of the brain pattern across the two samples, we correlated the Brainmint connectivity  
221 loadings with HBN connectivity loadings for each latent variable (LV) using Pearson’s  
222 correlation. Their significance was tested using permutations ( $n=1000$ ), randomly  
223 shuffling the rows (participants) of the Brainmint RSFC data. We calculated  $p$ -values by  
224 dividing the count of permuted maximum R values (including the observed non-  
225 permuted value)  $\geq$  the non-permuted R values by the number of permutations. Prior to  
226 analysis, Brainmint RSFC data was adjusted for age, sex, tSNR and FD, same as HBN RSFC  
227 data prior to running PLS. This was done by using FSLNets’ “nets\_unconfound” in  
228 MATLAB (MathWorks, 2020). As a proxy for significance, connectivity loadings were  
229 thresholded at  $Z$ -scores  $<|3|$  in visualisations, akin to the procedure in our previous work using  
230 PLS.

231

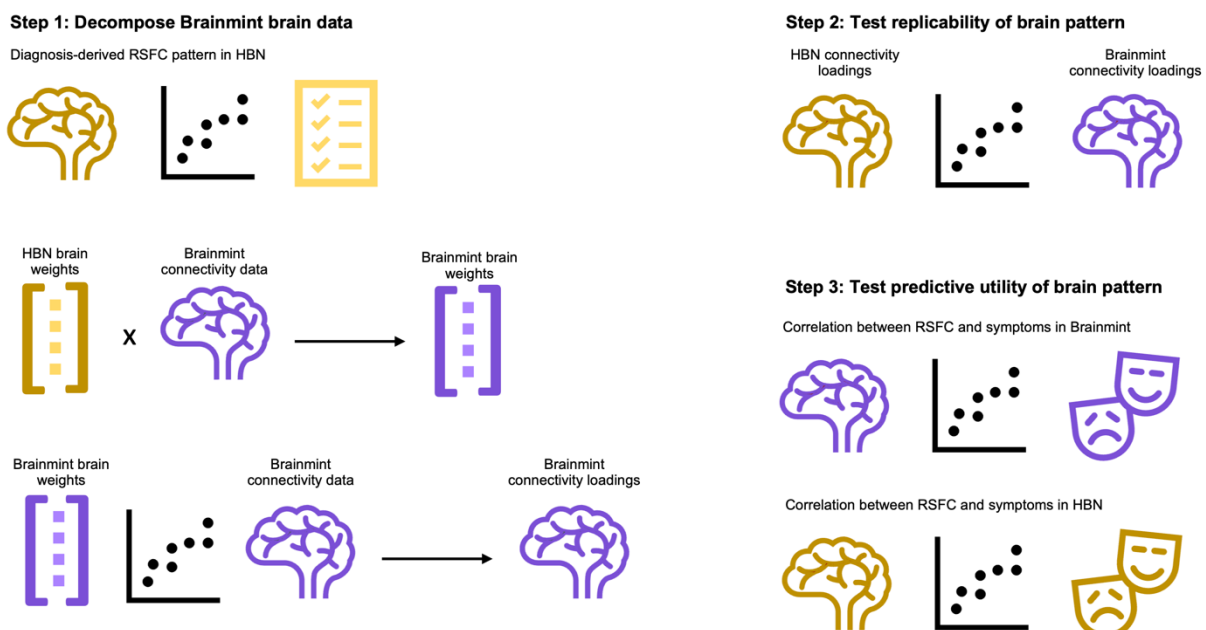

232

233 *Figure 2.* An overview of the out-of-sample validation pipeline. RSFC; resting-state functional  
234 connectivity. HBN; Healthy brain network sample. Brainmint; Brains and minds in transition sample.

235

### 236 *2.6.2 Testing the association of the brain pattern with symptom scores*

237 To assess whether the brain pattern was associated with symptom scores, we correlated the  
238 derived Brainmint RSFC pattern with Brainmint symptom data. Specifically, we investigated  
239 the Spearman's rank correlation between diagnosis-derived brain weights and symptom  
240 dimensions from SDQ. To assess the reliability of the associations between brain weights and  
241 symptom dimensions, we ran 1000 bootstraps using resampling with replacement. Reliability  
242 was defined as whether bootstrapped (with replacement) 95% confidence interval overlapped  
243 with zero (i.e., not overlapping with zero being considered reliable). Finally, as a test of  
244 external validity, we also ran these correlations between the HBN RSFC pattern and SDQ  
245 symptom dimensions in HBN.

246

## 247 **3 Results**

248 The correlation between Brainmint and HBN connectivity loadings was significant for both  
249 the cross-diagnostic pattern ( $r=.39$ , permuted  $p<.001$ ; see Figure 3A) and ASD ( $r=.49$ ,  
250 permuted  $p<.001$ ; see Figure 4A), indicating that both brain patterns were validated across  
251 samples. As shown in Figure 3B, the cross-diagnostic RSFC pattern implicated weaker  
252 connectivity within the control network, in addition to weaker between-network connectivity  
253 between the salience network and control network, as well as between the default mode  
254 network (DMN) and limbic network. In terms of symptom dimensions, this connectivity  
255 pattern exhibited significant positive associations with anxiety, conduct problems,  
256 hyperactivity, and peer problems in HBN, as well as a negative association with prosocial  
257 behaviour (see Figure 3C). In Brainmint, there were no significant associations between the  
258 cross-diagnostic connectivity pattern and symptom dimensions (see Figure 3D).

259 As shown in Figure 4B, the RSFC pattern for ASD implicated weaker within-network  
260 connectivity in the somatomotor network, dorsal attention (DA) network, salience network  
261 and DMN. In terms of symptom dimensions, this RSFC pattern was significantly associated  
262 with more symptoms of peer problems and hyperactivity in HBN, as well as lower degree of  
263 conduct problems and prosociality (see Figure 4C). In Brainmint, the ASD-specific RSFC  
264 pattern was associated with higher levels of prosocial behaviour and fewer symptoms of  
265 hyperactivity and conduct problems (see Figure 4D).

266



### Replication of cross-diagnostic connectivity pattern

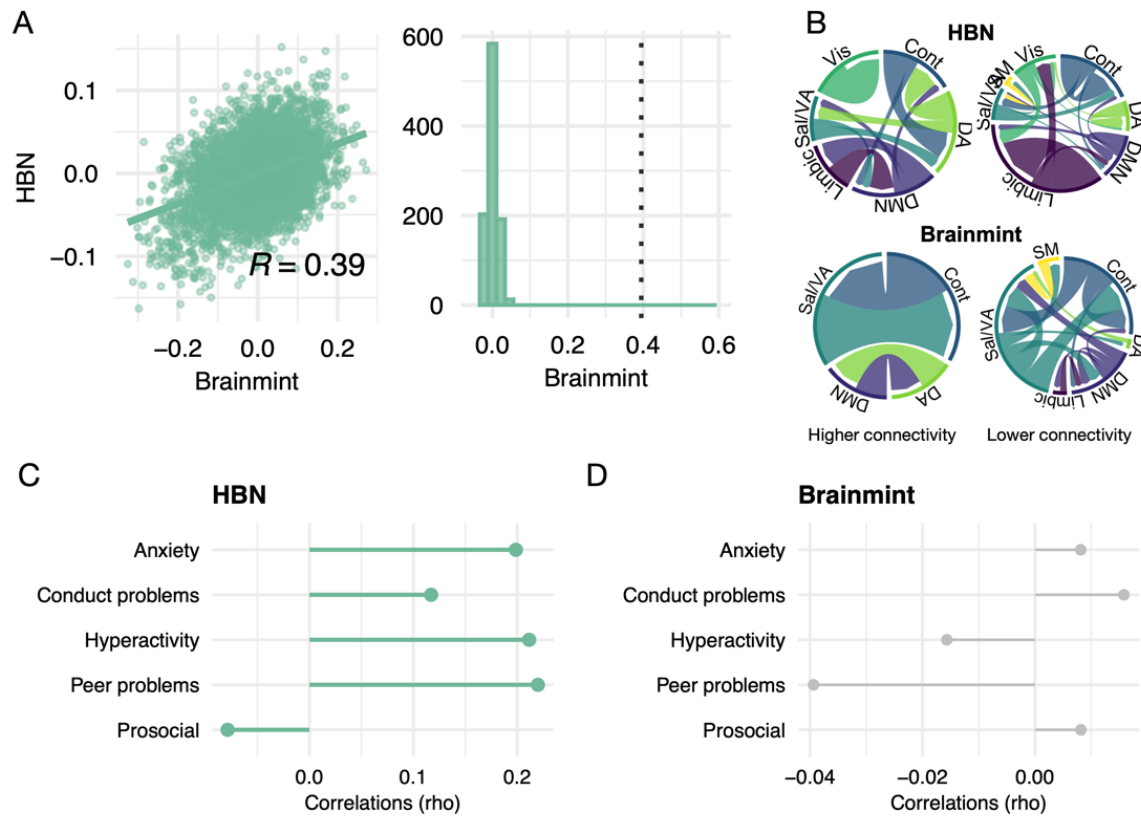

267  
268  
269  
270  
271  
272  
273  
274  
275  
276  
277  
278  
279

*Figure 3.* Validation of the cross-diagnostic connectivity pattern from HBN to Brainmint. **A.** Pearson's correlation of connectivity weights between samples (left) and corresponding permutation test (right). The dotted line marks the non-permuted R value. **B.** Visualisation of RSFC pattern in each sample. Magnitude in this plot reflects summarised edge strength across each network. Depicted are thresholded edges ( $Z$ -scores  $< |3|$ ). **C.** Associations between derived brain pattern and SDQ symptom dimensions in HBN. **D.** Associations between derived brain pattern and SDQ symptom dimensions in Brainmint. A positive correlation indicates higher connectivity is associated with higher symptom level and vice versa. Associations with symptom dimensions are marked in bold green if 95% confidence interval of the bootstrap distribution did not contain zero. ASD; Autism spectrum disorder. HBN; Healthy brain network sample. Brainmint; Brains and minds in transition sample. SDQ; strength and difficulties questionnaire.

## Replication of ASD-specific connectivity pattern

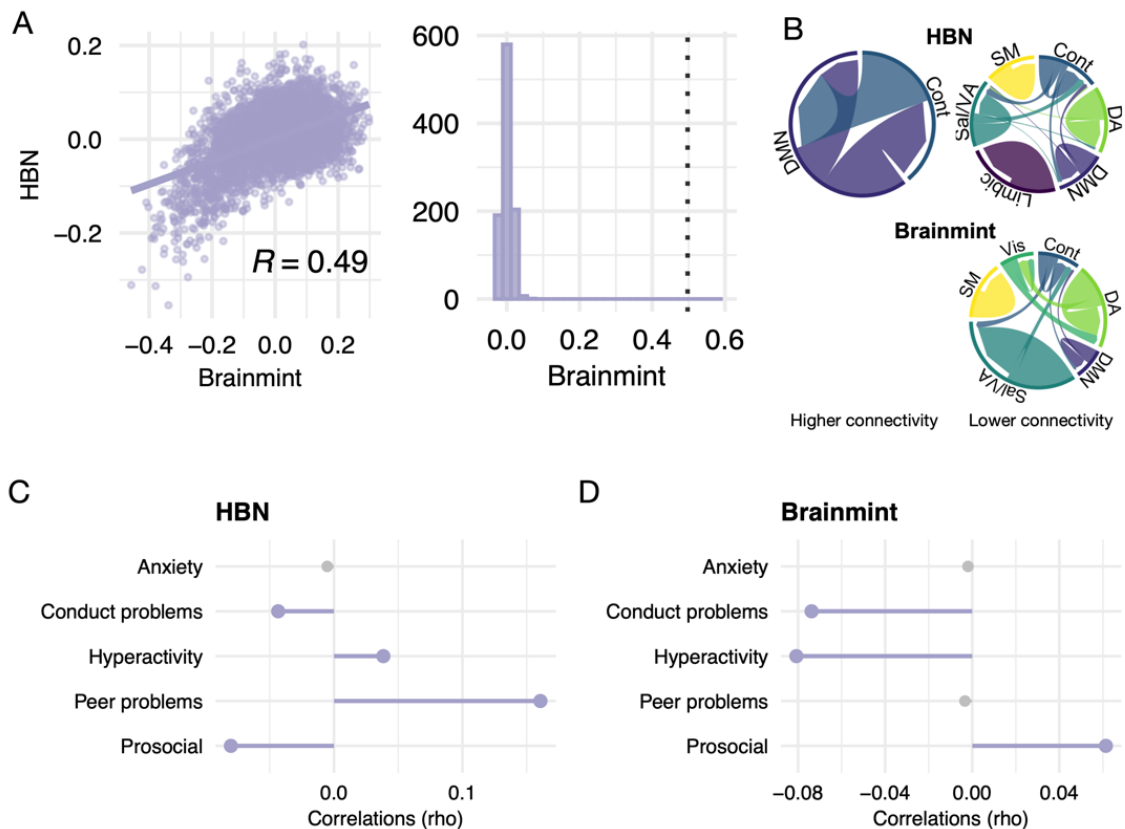

280  
 281 *Figure 4.* Validation of the ASD-specific connectivity pattern from HBN to Brainmint. **A.** Pearson's  
 282 correlation of connectivity weights between samples (left) and corresponding permutation test (right).  
 283 The dotted line marks the non-permuted R value. **B.** Visualisation of RSFC pattern in each sample.  
 284 Magnitude in this plot reflects summarised edge strength across each network. Depicted are  
 285 thresholded edges ( $Z$ -scores  $< |3|$ ). **C.** Associations between derived brain pattern and SDQ symptom  
 286 dimensions in HBN. **D.** Associations between derived brain pattern and SDQ symptom dimensions in  
 287 Brainmint. A positive correlation indicates higher connectivity is associated with higher symptom  
 288 level and vice versa. Associations with symptom dimensions are marked in bold purple if 95%  
 289 confidence interval of the bootstrap distribution did not contain zero. ASD; Autism spectrum disorder.  
 290 HBN; Healthy brain network sample. Brainmint; Brains and minds in transition sample. SDQ;  
 291 strength and difficulties questionnaire.

292

## 293 4 Discussion

294 The current study aimed to investigate whether psychopathology-related RSFC patterns are  
 295 informative of vulnerability for mental illness in undiagnosed individuals by validating  
 296 connectivity patterns derived in a developmental clinical sample from the US in a Norwegian  
 297 convenience-based sample of youth. However, the RSFC pattern was only sensitive to  
 298 symptom burden in the discovery sample. Specifically, we found that the RSFC patterns were  
 299 associated with symptom dimensions thematically overlapping with core symptom  
 300 characteristics in the discovery sample, while in the validation sample we found a weak,  
 301 inverse relationship for ASD. This latter association was small at the group-level, with great  
 302 variation at the individual level. Taken together, these results show that although diagnosis-

303 derived RSFC patterns replicate across samples, their utility is greatly limited due to their  
304 lack of sensitivity to symptom burden.

305         Replicability and generalisability of neuroimaging findings remain a challenge in the  
306 field (Botvinik-Nezer & Wager, 2022). Historically, small sample sizes and lack of  
307 methodological rigour have resulted in poor replication rates, possibly reflecting that many  
308 published findings are potential false positives (Ioannidis, 2005). To overcome such  
309 challenges, increasing effort has been put into developing procedures for reproducible  
310 science (Niso et al., 2022). With the advent of multivariate machine learning approaches in  
311 neuroscience, issues related to statistical power and extensive univariate testing in small  
312 samples have been improved (Botvinik-Nezer & Wager, 2022). However, these multivariate  
313 approaches come with new challenges, such as data leakage, overfitting and the need for  
314 sufficiently large data sets to ensure robustness (Botvinik-Nezer & Wager, 2022; Davatzikos,  
315 2019; Poldrack et al., 2020; Varoquaux, 2018). Although the current study aimed to  
316 overcome some of these challenges, we still did not obtain generalisable results.

317         Generalisation of RSFC patterns related to psychopathology has been hampered by  
318 challenges related to the stability and reliability of RSFC results, as well as variations in  
319 mental health profiles across cohorts (Uddin et al., 2017). Data driven approaches to  
320 symptom clustering have to some degree yielded reproducible clusters or hierarchies of  
321 symptom structure across samples (Caspi et al., 2014). Recently, we derived brain-based  
322 latent dimensions of psychopathology using symptom covariance with functional brain  
323 networks in HBN (Voldsbekk et al., 2023). Similar brain-based dimensions of  
324 psychopathology were identified in ABCD, combining measures of both brain structure and  
325 RSFC (Kebets et al., 2023). By decomposing the HBN data using feature weights estimated  
326 in ABCD from Kebets et al., we found that the symptom dimensions replicated, however the  
327 RSFC patterns did not (Voldsbekk et al., 2023). Previous attempts at replication of brain-  
328 symptom mapping in independent samples have shown similar findings of replicating latent  
329 clinical dimensions, but weak or non-replicable RSFC patterns (Linke et al., 2021). In light of  
330 this, it is surprising that the current study could validate diagnosis-based case-control and  
331 ASD-specific RSFC patterns from HBN to Brainmint. Of course, the validated RSFC pattern  
332 was not fully overlapping across the two cohorts. For example, notable differences can be  
333 observed in the higher connectivity profile associated with the cross-diagnostic pattern, in  
334 which HBN is exhibiting a greater number of networks involved compared to Brainmint. In  
335 addition, the clinical associations of this pattern in the discovery sample were not reproduced  
336 in the validation sample.

337         The current validation effort is conducted across two widely different samples, both in  
338 terms of age, sex distribution, and other demographical variables, and in their mental health  
339 profile. While the HBN sample consists of mainly children with diagnosed  
340 neurodevelopmental disorders, the Brainmint sample consists of adolescents recruited from  
341 the community. Some of these adolescents have elevated symptom burden and may meet the  
342 diagnostic criteria of a mental disorder, but this sample is not enriched with diagnoses as is  
343 the case with HBN. The symptom distribution is also different, with higher prevalence of  
344 anxiety symptoms in Brainmint, as compared to conduct problems and peer problems in  
345 HBN. In line with this, there is also a marked difference in the sex distribution across the two  
346 samples, with higher prevalence of males in HBN and the majority being female in

347 Brainmint. Given these differences, it is all the more striking that the RSFC patterns were  
348 validated. Concomitantly, this may also explain the difference in clinical associations. One  
349 possible explanation could be that the RSFC patterns do reflect some vulnerability to  
350 psychopathology, only it is not sensitive enough to be associated with mental health  
351 symptoms in a widely different sample.

352 Prior work seem to converge on the finding that RSFC patterns relating to  
353 psychopathology are transdiagnostic or shared across disorders (Elliott et al., 2018; Karcher  
354 et al., 2021; Kebets et al., 2023; Lees et al., 2021; Linke et al., 2021; McTeague et al., 2017;  
355 McTeague et al., 2020; Sha et al., 2019; Voldsbekk et al., 2023; Xia et al., 2018). This would  
356 suggest that if anything, RSFC patterns represent possible general markers of  
357 psychopathology rather than disorder-specific markers. This has implications for their utility  
358 as biomarkers, meaning RSFC patterns may be used to detect general vulnerability, but not  
359 vulnerability specific to specific disorders. In line with this, a recent systematic review based  
360 on studies only of the general population conclude that general psychopathology is related to  
361 various RSFC patterns across studies (Hoy et al., 2023). With regards to specific  
362 psychopathology, there was only one finding reported across more than one study, namely an  
363 association between a neurodevelopmental symptom dimension and lower connectivity  
364 within the DMN (Karcher et al., 2021; Modabbernia et al., 2022). These findings are  
365 strikingly consistent with our previous work in HBN – a developmental clinical sample  
366 (Voldsbekk et al., 2023). This suggests that RSFC-psychopathology associations should  
367 extend from clinical samples to population samples, consistent with the understanding of  
368 psychopathology as a dimensional structure. Of note, this highlights the relevance of  
369 investigating the overlap and reproducibility of RSFC-psychopathology associations from  
370 clinical to population-based samples. The current study represents one attempt at this.

371 Consistent with the symptom load distribution in HBN across diagnostic categories,  
372 the RSFC pattern in HBN picked up associations with peer problems, hyperactivity, and  
373 prosocial behaviour for the ASD-specific pattern and all symptom dimensions for the cross-  
374 diagnostic pattern. This represents a sanity check that the diagnosis-derived RSFC pattern in  
375 HBN picks up similar associations with symptom load as the diagnosis groups they are  
376 modelled to represent. Reliability of mental health measures has remained a challenge in the  
377 field (Nikolaidis et al., 2022). Here we show that RSFC patterns derived from diagnostic  
378 information exhibit associations with an independent measurement of symptom load that are  
379 overlapping with symptom load associations observed for each diagnostic category. This  
380 supports that these RSFC patterns reflect something that overlaps with their corresponding  
381 diagnostic categories. However, this sensitivity of the RSFC pattern was not generalisable to  
382 Brainmint. The RSFC pattern in Brainmint picked up an inverse relationship with prosocial  
383 behaviour, hyperactivity, and conduct problems for the ASD-specific pattern, indicating that  
384 higher prosociality and lower conduct problems and hyperactivity was associated with a more  
385 “ASD-like” brain pattern. This finding is paradoxical and the opposite of what one would  
386 expect. While it is too early to conclude based on one preliminary association only, it is  
387 worth noting that the strength of this association was low. Similarly, there was no significant  
388 associations with the cross-diagnostic pattern in Brainmint. Given these weak group-level  
389 associations, with great variation at the individual level, adding too much emphasis to this

390 preliminary finding is unwarranted. Instead, this result adheres to the previous literature  
391 finding generalisation of RSFC results a challenge (Uddin et al., 2017).

392 Some further limitations should be noted. First, RSFC results are influenced by  
393 methodological choices (Sala-Llonch et al., 2019; Shirer et al., 2015). To increase  
394 reproducibility of RSFC networks, we utilised an established parcellation scheme (Schaefer  
395 et al., 2018). Second, the two samples underwent slightly differing fMRI preprocessing  
396 pipelines. This difference should diminish, rather than inflate, any ability to reproduce  
397 findings, meaning that the current study represents a conservative approach to reproducibility  
398 with higher chance of false negatives than false positives. Third, the symptom dimensions  
399 from SDQ were measured by parent-report in HBN and by self-report in Brainmint. This  
400 difference may have induced systematic variations in the data across the two samples, as it is  
401 known that parent-report and self-report have small-to-moderate correlations (Gaete et al.,  
402 2018). This limitation represents a possible explanation for why we did not find overlapping  
403 associations between RSFC patterns and symptom level across the two cohorts. In addition,  
404 this may explain why the community-based sample seemed to exhibit a higher symptom  
405 burden than the clinical sample. This limitation represents an important reminder that low  
406 reliability in mental health measures impedes scientific discovery (Nikolaidis et al., 2022)  
407 and underscores that the current results must be interpreted with caution. Fourth, the age, sex,  
408 and clinical distributions across the two samples differed, meaning we cannot rule out  
409 whether the lack of generalisability across samples reflect these differences in distributions  
410 rather than a lack of reproducibility of RSFC-symptom patterns per se.

411

## 412 **5 Conclusions**

413 This work demonstrates that diagnosis-derived RSFC patterns in a US developmental clinical  
414 sample can be extended to a Norwegian convenience-based sample of youth. Both the cross-  
415 diagnostic and the ASD-specific RSFC patterns were validated across samples. However,  
416 although both connectivity patterns exhibited significant associations with thematically  
417 appropriate symptom dimensions in both the discovery sample (HBN), they were not found  
418 to be sensitive to overlapping dimensions of symptom burden in the validation sample  
419 (Brainmint). Implications of this work is that generalisation of RSFC results remains a  
420 challenge. For any psychopathology-related RSFC patterns to be generalisable and clinically  
421 relevant, their sensitivity to symptom burden across samples represents a prerequisite.

422

423

424 **Acknowledgements**

425 This project was funded by research grants from the Research Council of Norway (Grant  
426 Nos. L.T.W: 249795, 273345, 300767), the South-Eastern Norway Regional Health  
427 Authority (Grant Nos. L.T.W: 2014097, 2015073, 2016083, 2018076, 2019101. D.A:  
428 2019107, 2020086), KG Jebsen Stiftelsen, ERA-Net Cofund through the ERA PerMedproject  
429 IMPLEMENT, the Horizon Europe HORIZON-HLTH-2021-STAYHLTH-01 (101057429),  
430 and the European Research Council under the European Union s Horizon 2020 research and  
431 Innovation program (L.T.W: ERC StG Grant No. 802998).

432 The work was performed on the Service for Sensitive Data (TSD) platform, owned by  
433 the University of Oslo, operated, and developed by the TSD service group at the University  
434 of Oslo IT-Department (USIT). Computations were also performed using resources provided  
435 by UNINETT Sigma2—the National Infrastructure for High Performance Computing and  
436 Data Storage in Norway.

437

## 438 References

439

- 440 Alexander, L. M., Escalera, J., Ai, L., Andreotti, C., Febre, K., Mangone, A., Vega-Potler,  
441 N., Langer, N., Alexander, A., & Kovacs, M. (2017). An open resource for  
442 transdiagnostic research in pediatric mental health and learning disorders. *Scientific*  
443 *data*, 4(1), 1-26.
- 444 Botvinik-Nezer, R., & Wager, T. D. (2022). Reproducibility in Neuroimaging Analysis:  
445 Challenges and Solutions. *Biological Psychiatry: Cognitive Neuroscience and*  
446 *Neuroimaging*. <https://doi.org/https://doi.org/10.1016/j.bpsc.2022.12.006>
- 447 Caspi, A., Houts, R. M., Belsky, D. W., Goldman-Mellor, S. J., Harrington, H., Israel, S.,  
448 Meier, M. H., Ramrakha, S., Shalev, I., Poulton, R., & Moffitt, T. E. (2014). The p  
449 Factor: One General Psychopathology Factor in the Structure of Psychiatric  
450 Disorders? *Clin Psychol Sci*, 2(2), 119-137.  
451 <https://doi.org/10.1177/2167702613497473>
- 452 Davatzikos, C. (2019). Machine learning in neuroimaging: Progress and challenges.  
453 *NeuroImage*, 197, 652.
- 454 Elliott, M. L., Romer, A., Knodt, A. R., & Hariri, A. R. (2018). A Connectome-wide  
455 Functional Signature of Transdiagnostic Risk for Mental Illness. *Biological*  
456 *Psychiatry*, 84(6), 452-459.  
457 <https://doi.org/https://doi.org/10.1016/j.biopsych.2018.03.012>
- 458 Esteban, O., Birman, D., Schaer, M., Koyejo, O. O., Poldrack, R. A., & Gorgolewski, K. J.  
459 (2017). MRIQC: Advancing the automatic prediction of image quality in MRI from  
460 unseen sites. *PLoS ONE*, 12(9), e0184661.  
461 <https://doi.org/10.1371/journal.pone.0184661>
- 462 Esteban, O., Markiewicz, C. J., Blair, R. W., Moodie, C. A., Isik, A. I., Erramuzpe, A., Kent,  
463 J. D., Goncalves, M., DuPre, E., & Snyder, M. (2019). fMRIPrep: a robust  
464 preprocessing pipeline for functional MRI. *Nature methods*, 16(1), 111-116.
- 465 Gaete, J., Montero-Marin, J., Valenzuela, D., Rojas-Barahona, C. A., Olivares, E., & Araya,  
466 R. (2018). Mental health among children and adolescents: Construct validity,  
467 reliability, and parent-adolescent agreement on the 'Strengths and Difficulties  
468 Questionnaire' in Chile. *PLoS ONE*, 13(2), e0191809.  
469 <https://doi.org/10.1371/journal.pone.0191809>
- 470 Goodman, R. (1997). The Strengths and Difficulties Questionnaire: a research note. *Journal*  
471 *of Child Psychology and Psychiatry*, 38(5), 581-586.
- 472 Greve, D. N., & Fischl, B. (2009). Accurate and robust brain image alignment using  
473 boundary-based registration. *Neuroimage*, 48(1), 63-72.  
474 <https://doi.org/https://doi.org/10.1016/j.neuroimage.2009.06.060>
- 475 Griffanti, L., Salimi-Khorshidi, G., Beckmann, C. F., Auerbach, E. J., Douaud, G., Sexton, C.  
476 E., Zsoldos, E., Ebmeier, K. P., Filippini, N., Mackay, C. E., Moeller, S., Xu, J.,  
477 Yacoub, E., Baselli, G., Ugurbil, K., Miller, K. L., & Smith, S. M. (2014). ICA-based  
478 artefact removal and accelerated fMRI acquisition for improved resting state network  
479 imaging. *NeuroImage*, 95, 232-247.  
480 <https://doi.org/https://doi.org/10.1016/j.neuroimage.2014.03.034>
- 481 Hoy, N., Lynch, S. J., Waszczuk, M. A., Reppermund, S., & Mewton, L. (2023).  
482 Transdiagnostic biomarkers of mental illness across the lifespan: A systematic review  
483 examining the genetic and neural correlates of latent transdiagnostic dimensions of  
484 psychopathology in the general population. *Neuroscience & Biobehavioral Reviews*,  
485 155, 105431. <https://doi.org/https://doi.org/10.1016/j.neubiorev.2023.105431>
- 486 Ioannidis, J. P. (2005). Why most published research findings are false. *PLoS medicine*, 2(8),  
487 e124.

- 488 Jenkinson, M., Bannister, P., Brady, M., & Smith, S. (2002). Improved optimization for the  
489 robust and accurate linear registration and motion correction of brain images.  
490 *NeuroImage*, 17(2), 825-841. [https://doi.org/10.1016/S1053-8119\(02\)91132-8](https://doi.org/10.1016/S1053-8119(02)91132-8)
- 491 Karcher, N. R., Michelini, G., Kotov, R., & Barch, D. M. (2021). Associations Between  
492 Resting-State Functional Connectivity and a Hierarchical Dimensional Structure of  
493 Psychopathology in Middle Childhood. *Biological Psychiatry: Cognitive  
494 Neuroscience and Neuroimaging*, 6(5), 508-517.  
495 <https://doi.org/https://doi.org/10.1016/j.bpsc.2020.09.008>
- 496 Kaufman, J., Birmaher, B., Brent, D., Rao, U. M. A., Flynn, C., Moreci, P., Williamson, D.,  
497 & Ryan, N. (1997). Schedule for Affective Disorders and Schizophrenia for School-  
498 Age Children-Present and Lifetime Version (K-SADS-PL): Initial Reliability and  
499 Validity Data. *Journal of the American Academy of Child & Adolescent Psychiatry*,  
500 36(7), 980-988. <https://doi.org/https://doi.org/10.1097/00004583-199707000-00021>
- 501 Kebets, V., Piguet, C., Chen, J., Ooi, L. Q. R., Kirschner, M., Siffredi, V., Mistic, B., Yeo, B.  
502 T., & Bernhardt, B. (2023). Multimodal neural correlates of childhood  
503 psychopathology. *bioRxiv*, 2023.2003. 2002.530821.
- 504 Kessler, R. C., Angermeyer, M., Anthony, J. C., De Graaf, R., Demyttenaere, K., Gasquet, I.,  
505 De Girolamo, G., Gluzman, S., Gureje, O., & Haro, J. M. (2007). Lifetime prevalence  
506 and age-of-onset distributions of mental disorders in the World Health Organization's  
507 World Mental Health Survey Initiative. *World psychiatry*, 6(3), 168.
- 508 Krishnan, A., Williams, L. J., McIntosh, A. R., & Abdi, H. (2011). Partial Least Squares  
509 (PLS) methods for neuroimaging: A tutorial and review. *NeuroImage*, 56(2), 455-475.  
510 <https://doi.org/https://doi.org/10.1016/j.neuroimage.2010.07.034>
- 511 Lees, B., Squeglia, L. M., McTeague, L. M., Forbes, M. K., Krueger, R. F., Sunderland, M.,  
512 Baillie, A. J., Koch, F., Teesson, M., & Mewton, L. (2021). Altered Neurocognitive  
513 Functional Connectivity and Activation Patterns Underlie Psychopathology in  
514 Preadolescence. *Biological Psychiatry: Cognitive Neuroscience and Neuroimaging*,  
515 6(4), 387-398. <https://doi.org/https://doi.org/10.1016/j.bpsc.2020.09.007>
- 516 Linke, J. O., Abend, R., Kircanski, K., Clayton, M., Stavish, C., Benson, B. E., Brotman, M.  
517 A., Renaud, O., Smith, S. M., Nichols, T. E., Leibenluft, E., Winkler, A. M., & Pine,  
518 D. S. (2021). Shared and Anxiety-Specific Pediatric Psychopathology Dimensions  
519 Manifest Distributed Neural Correlates. *Biological Psychiatry*, 89(6), 579-587.  
520 <https://doi.org/10.1016/j.biopsych.2020.10.018>
- 521 MathWorks. (2020). *MATLAB*. In
- 522 McTeague, L. M., Huemer, J., Carreon, D. M., Jiang, Y., Eickhoff, S. B., & Etkin, A. (2017).  
523 Identification of Common Neural Circuit Disruptions in Cognitive Control Across  
524 Psychiatric Disorders. *American Journal of Psychiatry*, 174(7), 676-685.  
525 <https://doi.org/10.1176/appi.ajp.2017.16040400>
- 526 McTeague, L. M., Rosenberg, B. M., Lopez, J. W., Carreon, D. M., Huemer, J., Jiang, Y.,  
527 Chick, C. F., Eickhoff, S. B., & Etkin, A. (2020). Identification of common neural  
528 circuit disruptions in emotional processing across psychiatric disorders. *American  
529 Journal of Psychiatry*, 177(5), 411-421.
- 530 Modabbernia, A., Michelini, G., Reichenberg, A., Kotov, R., Barch, D., & Frangou, S.  
531 (2022). Neural Signatures of Data-Driven Psychopathology Dimensions at the  
532 Transition to Adolescence. *European Psychiatry*, 1-27.  
533 <https://doi.org/10.1192/j.eurpsy.2021.2262>
- 534 Nikolaidis, A., Chen, A. A., He, X., Shinohara, R., Vogelstein, J., Milham, M., & Shou, H.  
535 (2022). Suboptimal phenotypic reliability impedes reproducible human neuroscience.  
536 *bioRxiv*, 2022.2007. 2022.501193.



- 537 Niso, G., Botvinik-Nezer, R., Appelhoff, S., De La Vega, A., Esteban, O., Etzel, J. A., Finc,  
538 K., Ganz, M., Gau, R., & Halchenko, Y. O. (2022). Open and reproducible  
539 neuroimaging: from study inception to publication. *NeuroImage*, 119623.
- 540 Paus, T., Keshavan, M., & Giedd, J. N. (2008). Why do many psychiatric disorders emerge  
541 during adolescence? *Nature Reviews Neuroscience*, 9(12), 947-957.  
542 <https://www.nature.com/articles/nrn2513.pdf>
- 543 Poldrack, R. A., Huckins, G., & Varoquaux, G. (2020). Establishment of best practices for  
544 evidence for prediction: a review. *JAMA Psychiatry*, 77(5), 534-540.
- 545 Power, J. D., Fair, D. A., Schlaggar, B. L., & Petersen, S. E. (2010). The development of  
546 human functional brain networks. *Neuron*, 67(5), 735-748.
- 547 Pruim, R. H. R., Mennes, M., Buitelaar, J. K., & Beckmann, C. F. (2015). Evaluation of ICA-  
548 AROMA and alternative strategies for motion artifact removal in resting state fMRI.  
549 *NeuroImage*, 112, 278-287.  
550 <https://doi.org/https://doi.org/10.1016/j.neuroimage.2015.02.063>
- 551 Pruim, R. H. R., Mennes, M., van Rooij, D., Llera, A., Buitelaar, J. K., & Beckmann, C. F.  
552 (2015). ICA-AROMA: A robust ICA-based strategy for removing motion artifacts  
553 from fMRI data. *NeuroImage*, 112, 267-277.  
554 <https://doi.org/https://doi.org/10.1016/j.neuroimage.2015.02.064>
- 555 Sala-Llonch, R., Smith, S. M., Woolrich, M., & Duff, E. P. (2019). Spatial parcellations,  
556 spectral filtering, and connectivity measures in fMRI: Optimizing for discrimination.  
557 *Human Brain Mapping*, 40(2), 407-419.
- 558 Salimi-Khorshidi, G., Douaud, G., Beckmann, C. F., Glasser, M. F., Griffanti, L., & Smith, S.  
559 M. (2014). Automatic denoising of functional MRI data: Combining independent  
560 component analysis and hierarchical fusion of classifiers. *NeuroImage*, 90, 449-468.  
561 <https://doi.org/https://doi.org/10.1016/j.neuroimage.2013.11.046>
- 562 Schaefer, A., Kong, R., Gordon, E. M., Laumann, T. O., Zuo, X.-N., Holmes, A. J., Eickhoff,  
563 S. B., & Yeo, B. T. T. (2018). Local-Global Parcellation of the Human Cerebral  
564 Cortex from Intrinsic Functional Connectivity MRI. *Cerebral Cortex*, 28(9), 3095-  
565 3114. <https://doi.org/10.1093/cercor/bhx179>
- 566 Sha, Z., Wager, T. D., Mechelli, A., & He, Y. (2019). Common Dysfunction of Large-Scale  
567 Neurocognitive Networks Across Psychiatric Disorders. *Biological Psychiatry*, 85(5),  
568 379-388. <https://doi.org/https://doi.org/10.1016/j.biopsych.2018.11.011>
- 569 Shirer, W. R., Jiang, H., Price, C. M., Ng, B., & Greicius, M. D. (2015). Optimization of rs-  
570 fMRI pre-processing for enhanced signal-noise separation, test-retest reliability, and  
571 group discrimination. *NeuroImage*, 117, 67-79.
- 572 Sprooten, E., Franke, B., & Greven, C. U. (2022). The P-factor and its genomic and neural  
573 equivalents: an integrated perspective. *Molecular Psychiatry*, 27(1), 38-48.
- 574 Sydnor, V. J., Larsen, B., Bassett, D. S., Alexander-Bloch, A., Fair, D. A., Liston, C.,  
575 Mackey, A. P., Milham, M. P., Pines, A., & Roalf, D. R. (2021). Neurodevelopment  
576 of the association cortices: Patterns, mechanisms, and implications for  
577 psychopathology. *Neuron*, 109(18), 2820-2846.
- 578 Uddin, L. Q., Dajani, D. R., Voorhies, W., Bednarz, H., & Kana, R. K. (2017). Progress and  
579 roadblocks in the search for brain-based biomarkers of autism and attention-  
580 deficit/hyperactivity disorder. *Translational Psychiatry*, 7(8), e1218-e1218.  
581 <https://doi.org/10.1038/tp.2017.164>
- 582 Varoquaux, G. (2018). Cross-validation failure: Small sample sizes lead to large error bars.  
583 *NeuroImage*, 180, 68-77.
- 584 Voldsbakk, I., Kjelkenes, R., Dahl, A., Holm, M. C., Lund, M. J., Kaufmann, T., Tamnes, C.  
585 K., Andreassen, O. A., Westlye, L. T., & Alnæs, D. (2023). Delineating disorder-  
586 general and disorder-specific dimensions of psychopathology from functional brain

587 networks in a developmental clinical sample. *Developmental Cognitive Neuroscience*,  
588 62, 101271. <https://doi.org/10.1016/j.dcn.2023.101271>  
589 Woolrich, M. W., Ripley, B. D., Brady, M., & Smith, S. M. (2001). Temporal  
590 Autocorrelation in Univariate Linear Modeling of FMRI Data. *NeuroImage*, 14(6),  
591 1370-1386. <https://doi.org/10.1006/nimg.2001.0931>  
592 Xia, C. H., Ma, Z., Ciric, R., Gu, S., Betzel, R. F., Kaczkurkin, A. N., Calkins, M. E., Cook,  
593 P. A., García de la Garza, A., Vandekar, S. N., Cui, Z., Moore, T. M., Roalf, D. R.,  
594 Ruparel, K., Wolf, D. H., Davatzikos, C., Gur, R. C., Gur, R. E., Shinohara, R. T.,  
595 Bassett, D. S., & Satterthwaite, T. D. (2018). Linked dimensions of psychopathology  
596 and connectivity in functional brain networks. *Nature Communications*, 9(1), 3003.  
597 <https://doi.org/10.1038/s41467-018-05317-y>  
598
