# Supplementary material for: Testing the sensitivity of diagnosis-derived patterns in functional brain networks to symptom burden in a Norwegian youth sample
Source: bioRxiv or medRxiv preprint supplement (doi:10.1101/2023.10.09.23296736), 2024-01-30
Supplement: Supplementary file [file media-1.pdf]

## Supplementary Material

### Content

- Supplementary Figure 1. SDQ symptom distributions across diagnostic categories in HBN
- Supplementary Table 1. Demographic table with clinical values scoring over cut-off
- Supplementary references

**Supplementary Figure 1. SDQ symptom distributions across diagnostic categories in HBN**

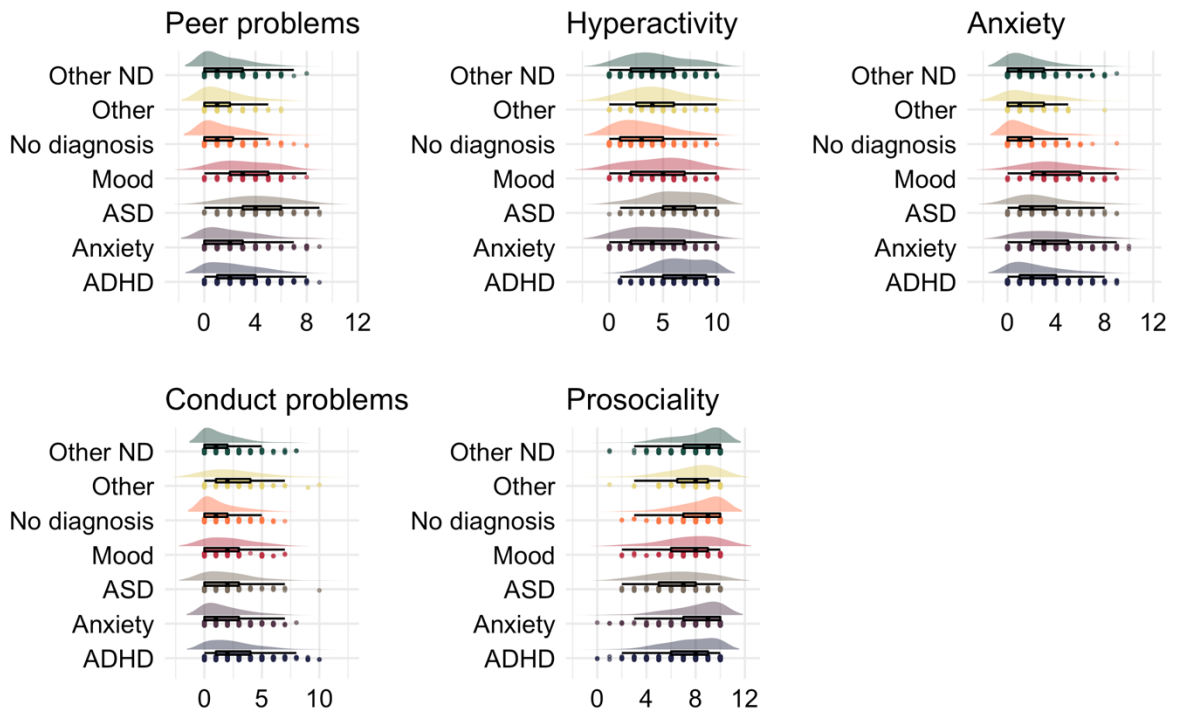

**Supplementary Table 1. Demographic table with clinical values scoring over cut-off**

|                                | <b>HBN (n = 1666)</b> | <b>Brainmint (n = 531)</b> |
|--------------------------------|-----------------------|----------------------------|
| <b>Demographic information</b> |                       |                            |
| Age                            | 10.91 ± 3.14          | 17.69 ± 2.83               |
| Sex (n female)                 | 641                   | 390                        |
| <b>SDQ sumscores</b>           |                       |                            |
| Peer problems                  | 2.19 ± 2.06 [419]     | 2.54 ± 1.88 [136]          |
| Hyperactivity                  | 5.3 ± 2.84 [599]      | 4.38 ± 2.58 [121]          |
| Anxiety                        | 2.43 ± 2.23 [301]     | 4.4 ± 2.68 [245]           |
| Conduct problems               | 1.96 ± 1.96 [321]     | 1.61 ± 1.49 [59]           |
| Prosociality                   | 7.78 ± 2.09 [124]     | 8.56 ± 1.56 [10]           |

*Note.* Mean ± standard deviation [Number of participants scoring above clinical cut-off] (Bryant et al., 2020). HBN; Healthy brain network. Brainmint; Brains and minds in transition study. SDQ; Strength and difficulties questionnaire.

### **Supplementary references**

Bryant, A., Guy, J., & Holmes, J. (2020). The Strengths and Difficulties Questionnaire Predicts Concurrent Mental Health Difficulties in a Transdiagnostic Sample of Struggling Learners. *Front Psychol, 11*, 587821. <https://doi.org/10.3389/fpsyg.2020.587821>
